# Supplementary material for: Highly reversible Li/Li2S3 batteries with an advanced cathode structure
Source: Royal Society of Chemistry journal article supplement (doi:10.1039/d3se00005b), 2023-01-01
Supplement: d3se00005b1.pdf [file d3se00005b1.pdf]

# Supplementary Information

for

## High Reversible Li/Li<sub>2</sub>S<sub>3</sub> Batteries with an Advanced Cathode Structure

Zhong Wang,<sup>a\*</sup> Fangmin Ye,<sup>b\*</sup> Zeyun Ma,<sup>a</sup> Yongming Jiang,<sup>b</sup> and Meinan Liu<sup>c\*</sup>

<sup>a</sup> Jiyang College of Zhejiang A&F University, Zhuji, 311800, China

E-mail: 20120034@zafu.edu.cn

<sup>b</sup> Key Laboratory of Optical Field Manipulation of Zhejiang Province, Department of Physics,

Zhejiang Sci-Tech University, Hangzhou 310018, China. E-mail: fmye2013@sinano.ac.cn

<sup>c</sup> i-Lab, Suzhou Institute of Nano-Tech and Nano-Bionics, Chinese Academy of Sciences, Suzhou

215123, China. E-mail: mnliu2013@sinano.ac.cn

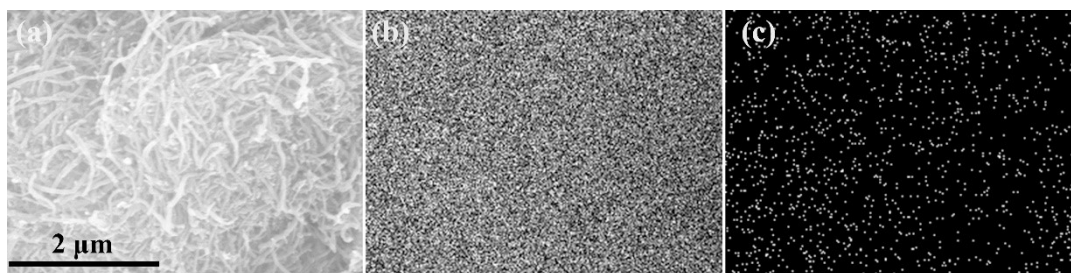

Figure S1. Elementary Mapping for NCNT. (a) SEM image;(b) Mapping for C element; and (c) Mapping for N element.

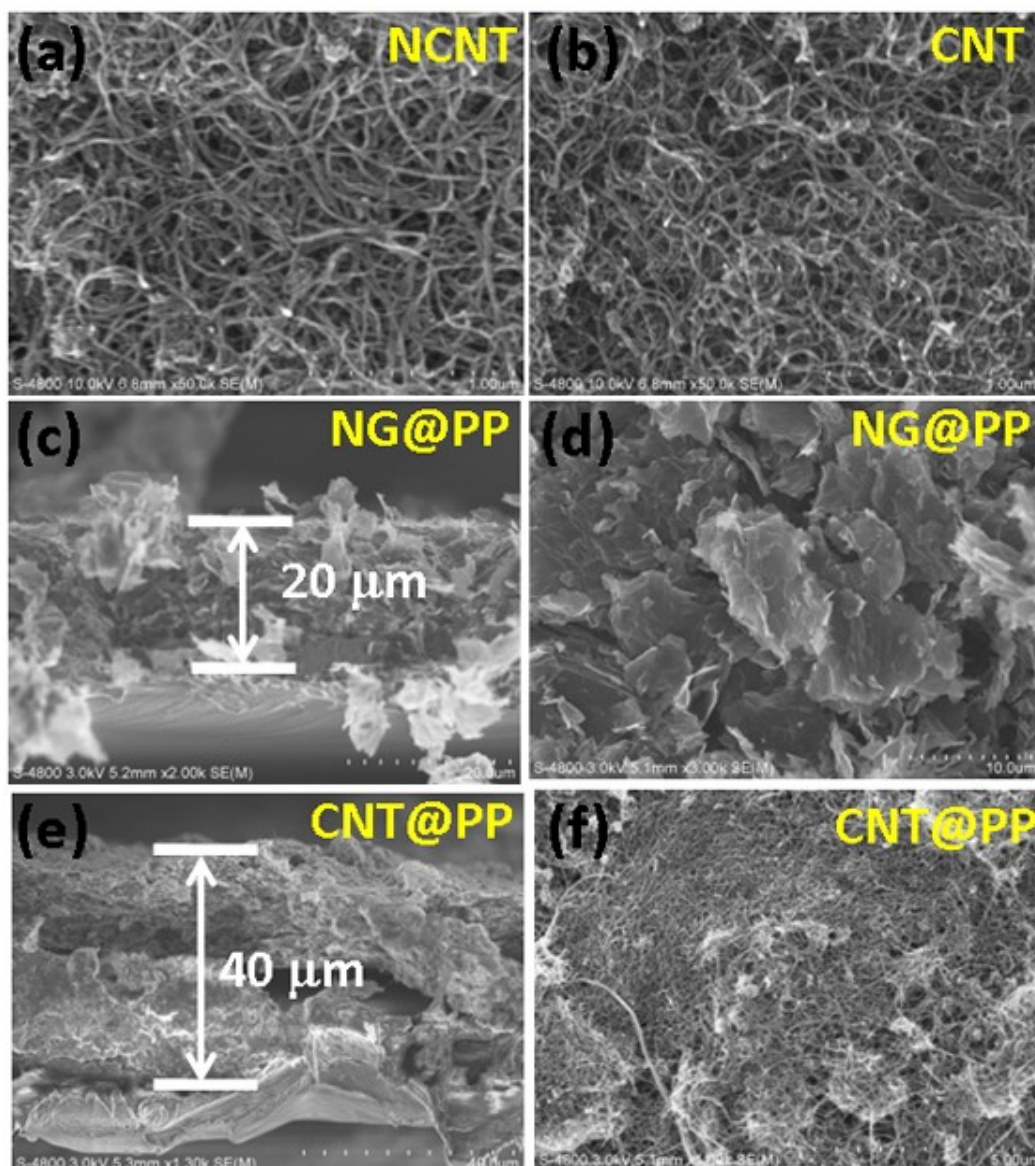

Figure S2. SEM images for various samples. (a) NCNT; (b) pristine CNT; (c) and (d) cross-section and top view of NG coated PP separator, respectively; (e) and (f) cross-section and top view of CNT@PP separator, respectively.

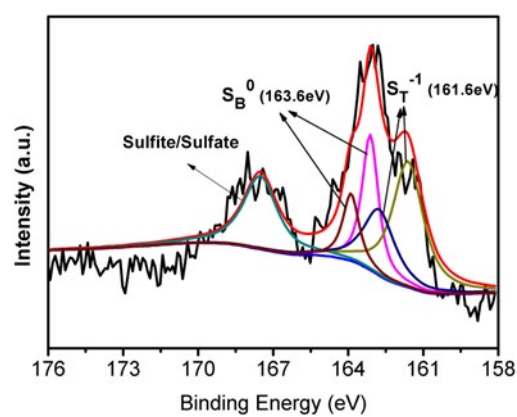

Figure S3. High-resolution XPS S 2p spectra for  $\text{Li}_2\text{S}_3$ .

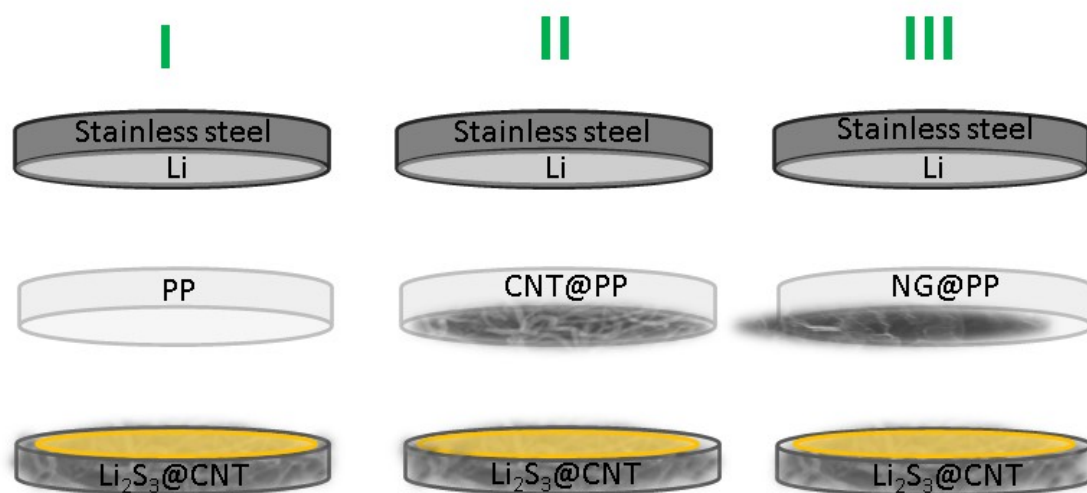

Figure S4. Schematic of battery configurations for comparison: I) Li<sub>2</sub>S<sub>3</sub>@CNT cathode, commercial PP separator and Li anode; II) Li<sub>2</sub>S<sub>3</sub>@CNT cathode, CNT@PP separator and Li anode; III) Li<sub>2</sub>S<sub>3</sub>@CNT cathode, NG@PP separator and Li anode.

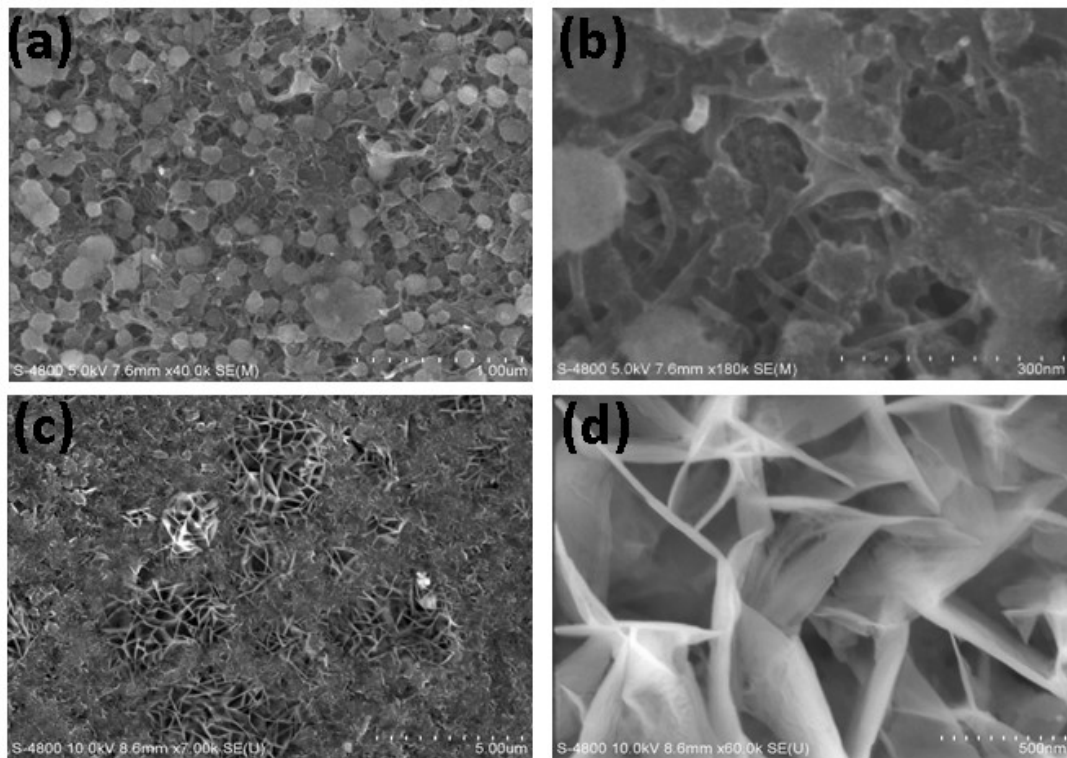

Figure S5. SEM images for cycled NCNT cathode. (a) and (b) for 1<sup>st</sup> cycled cathode and (c) and (d) for 200<sup>th</sup> cycled cathode.

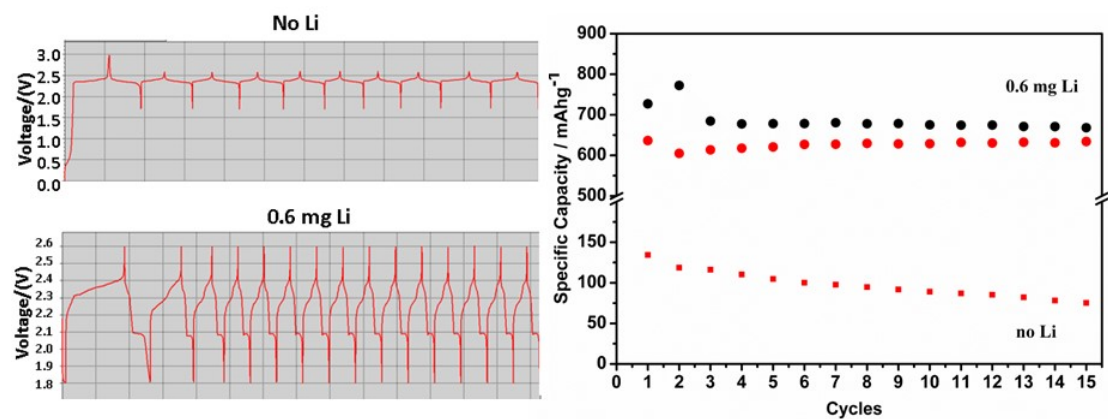

Figure S6. Electrochemical performance for Li-free and minor Li matched  $\text{Li}_2\text{S}_3$  batteries.
